# Supplementary material for: Separacenes A–D, Novel Polyene Polyols from the Marine Actinomycete, Streptomyces sp
Source: PubMed Central journal article supplement (PMC3766871; doi:10.3390/md11082882), 2013-08-13
Supplement: marinedrugs-11-02882-s001.pdf [file marinedrugs-11-02882-s001.pdf]

# Supplementary Materials

**Figure S1.**  $^1\text{H}$  NMR spectrum of separacene A (**1**) at 900 MHz in pyridine- $d_5$ .

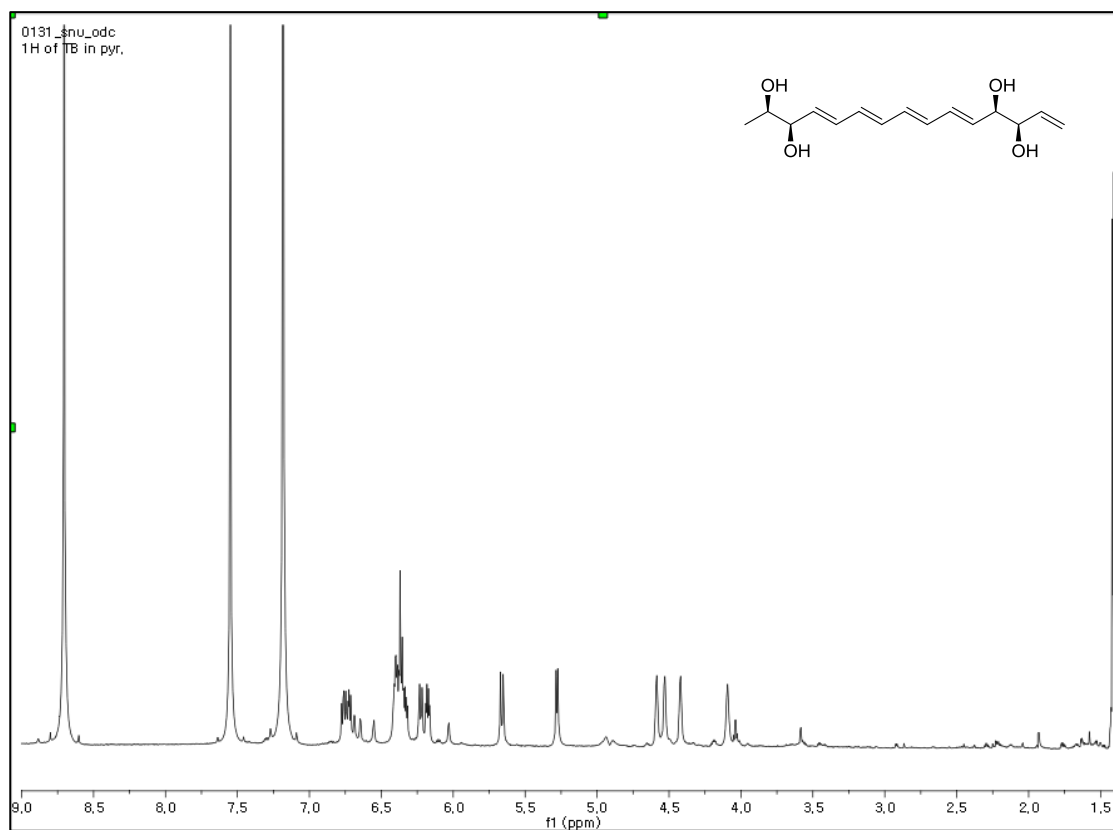

**Figure S2.**  $^{13}\text{C}$  NMR spectrum of separacene A (**1**) at 225 MHz in pyridine- $d_5$ .

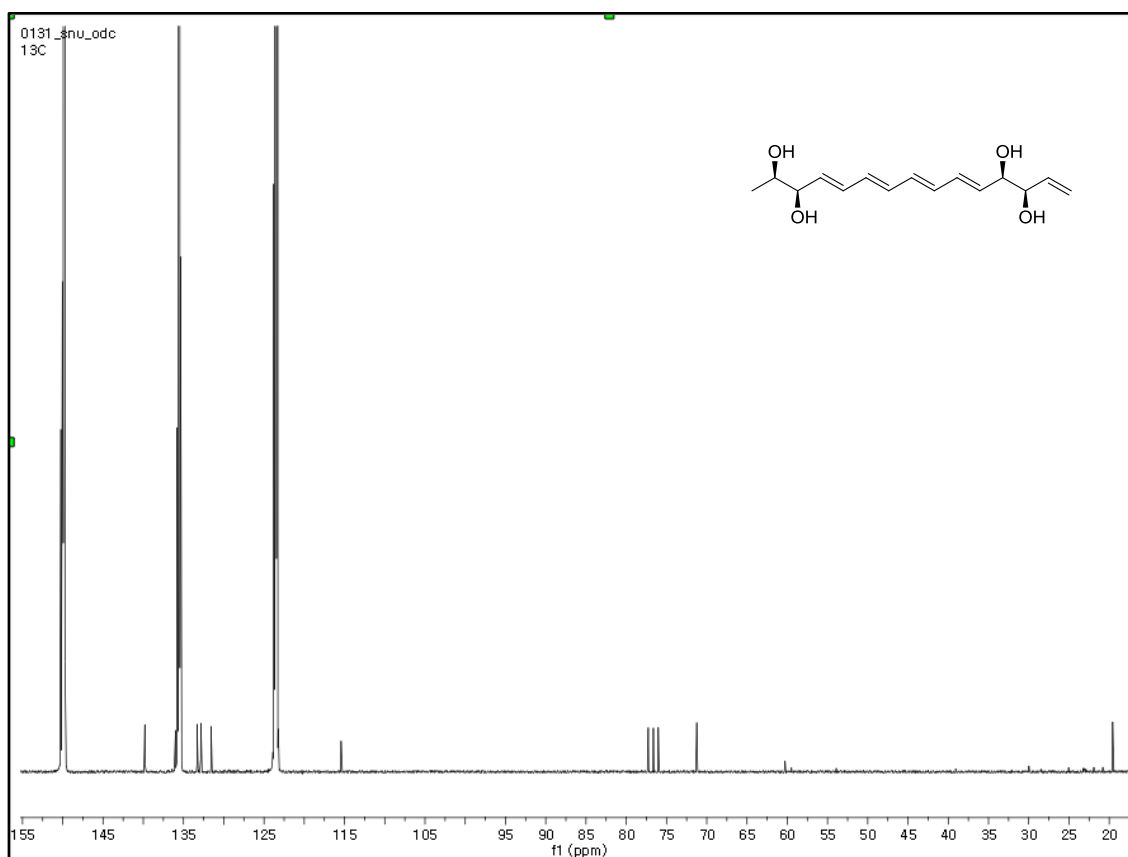

**Figure S3.**  $^1\text{H}$ - $^1\text{H}$  COSY spectrum of separacene A (**1**) at 900 MHz in pyridine- $d_5$ .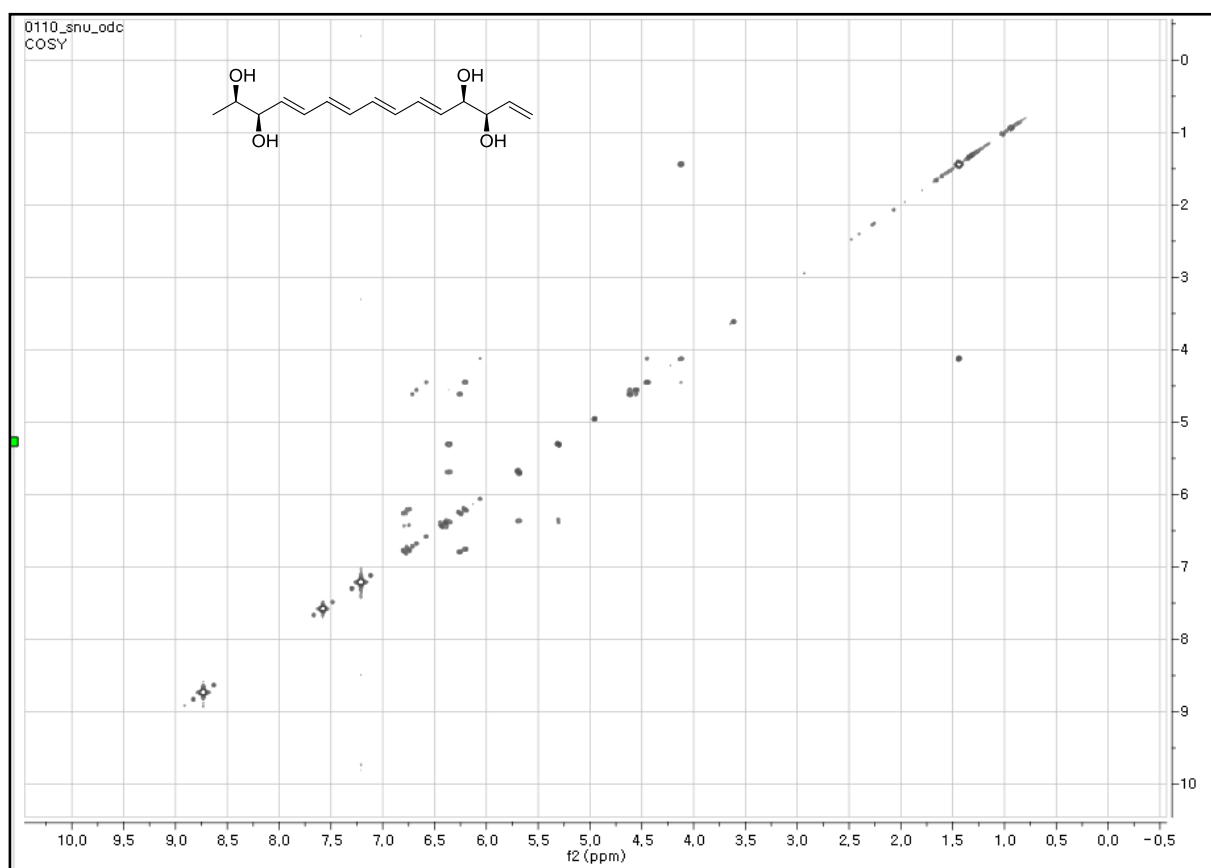**Figure S4.** HSQC spectrum of separacene A (**1**) at 900 MHz in pyridine- $d_5$ .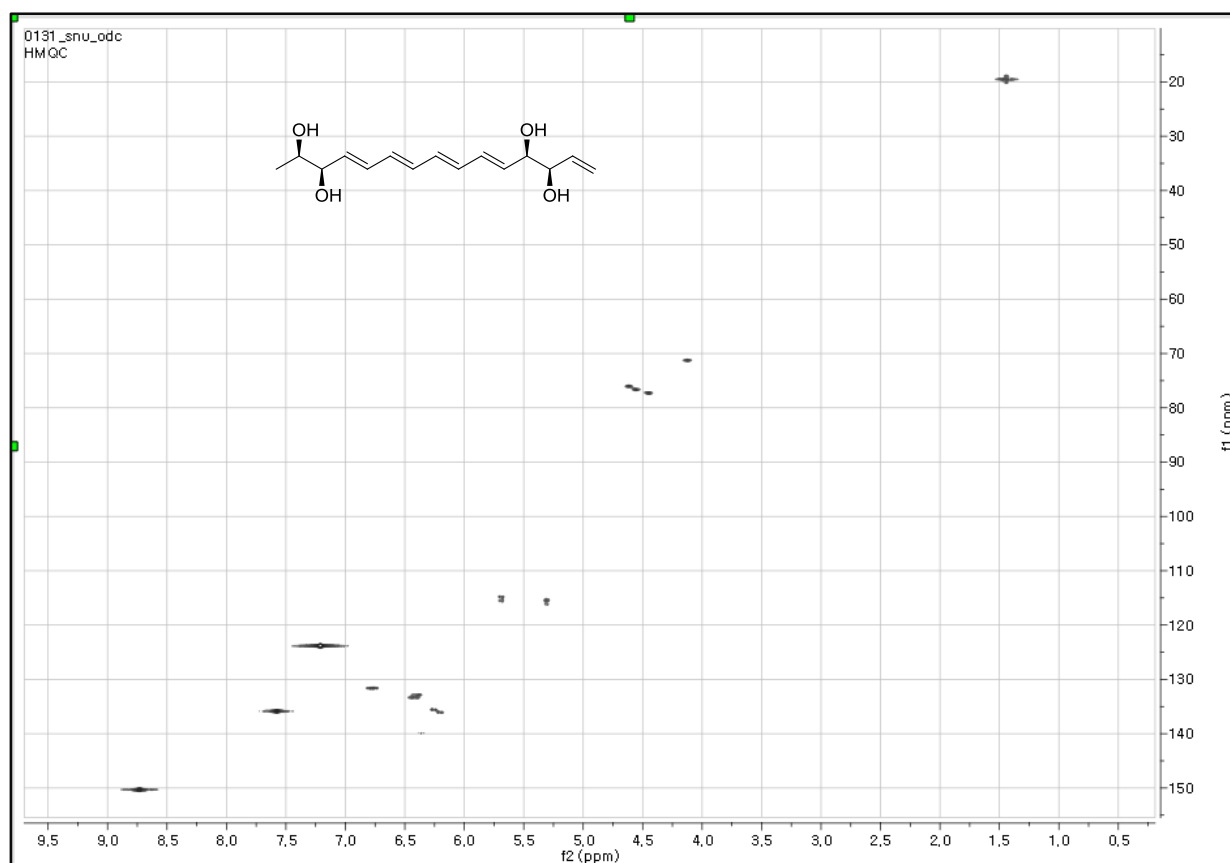

**Figure S5.** HMBC spectrum of separacene A (1) at 900 MHz in pyridine-*d*<sub>5</sub>.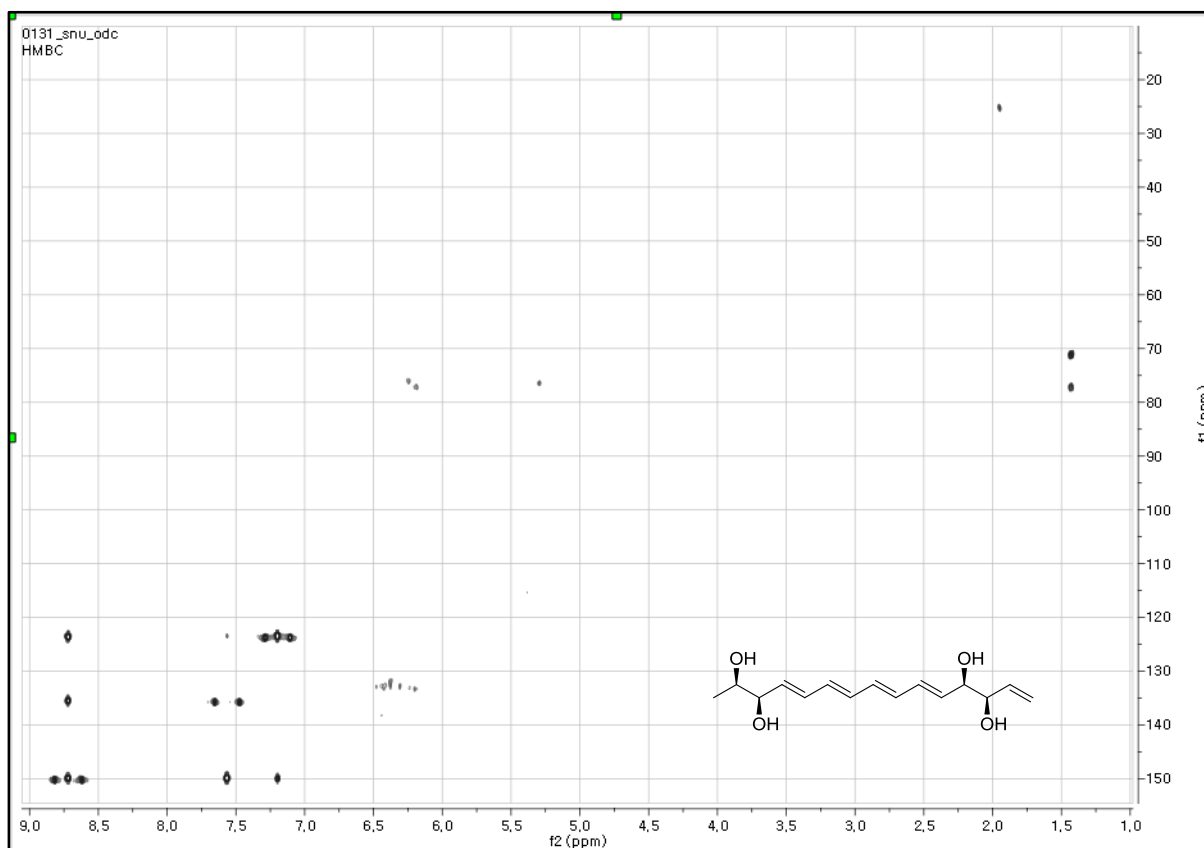**Figure S6.** NOESY spectrum of separacene A (1) at 900 MHz in pyridine-*d*<sub>5</sub>.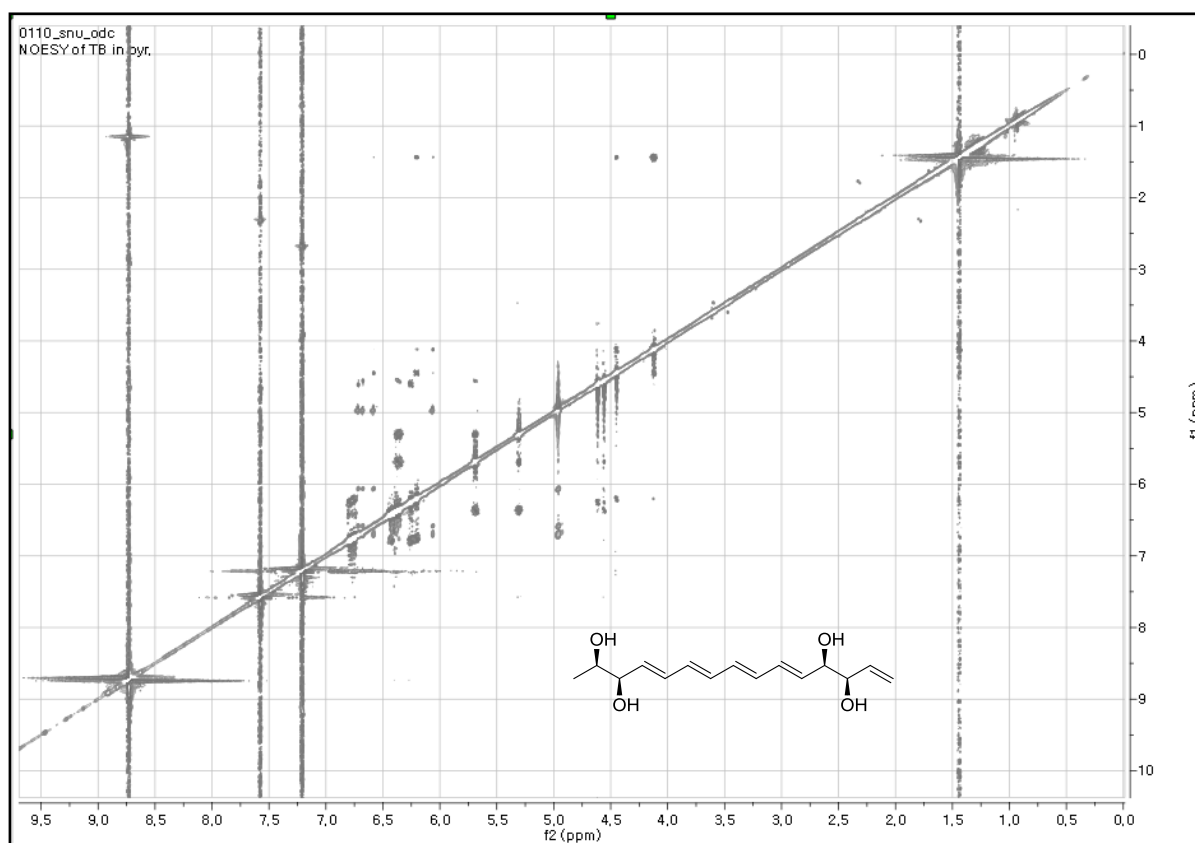

**Figure S7.**  $^1\text{H}$  NMR spectrum of separacene B (**2**) at 600 MHz in pyridine- $d_5$ .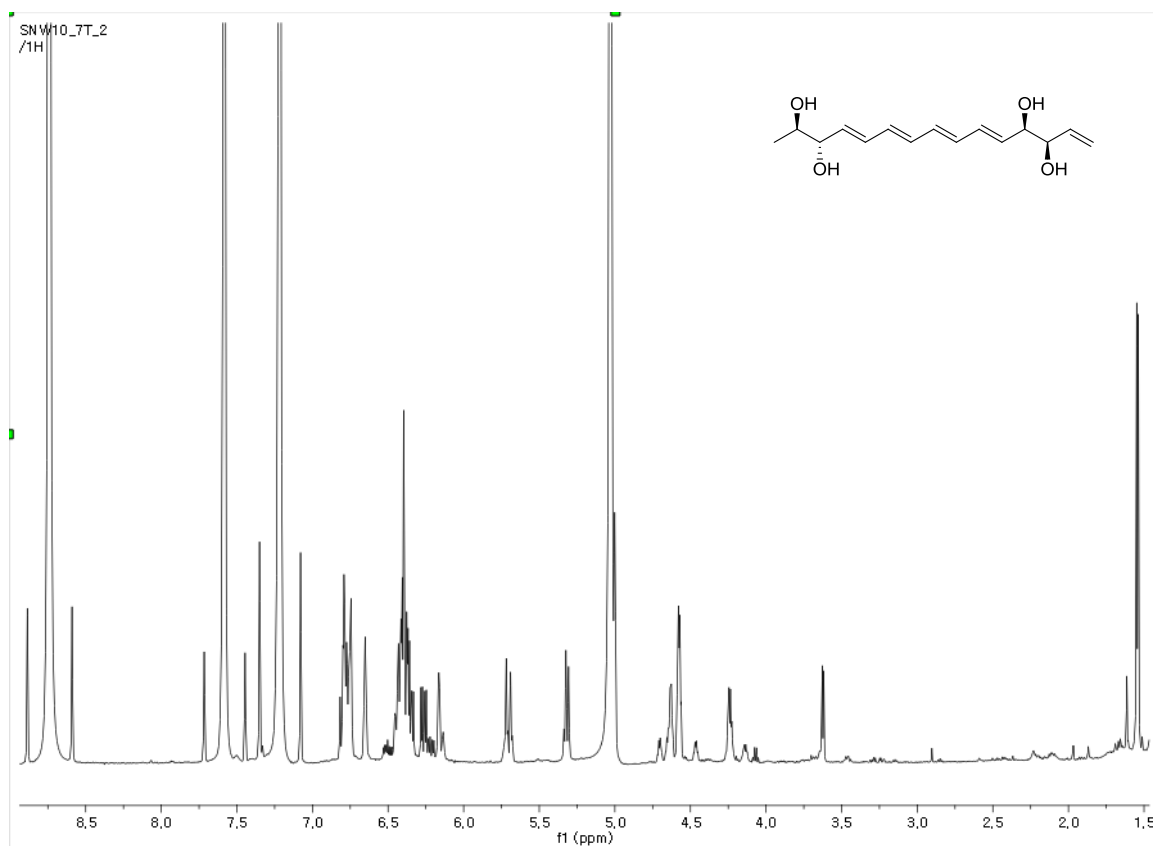**Figure S8.**  $^{13}\text{C}$  NMR spectrum of separacene B (**2**) at 125 MHz in pyridine- $d_5$ .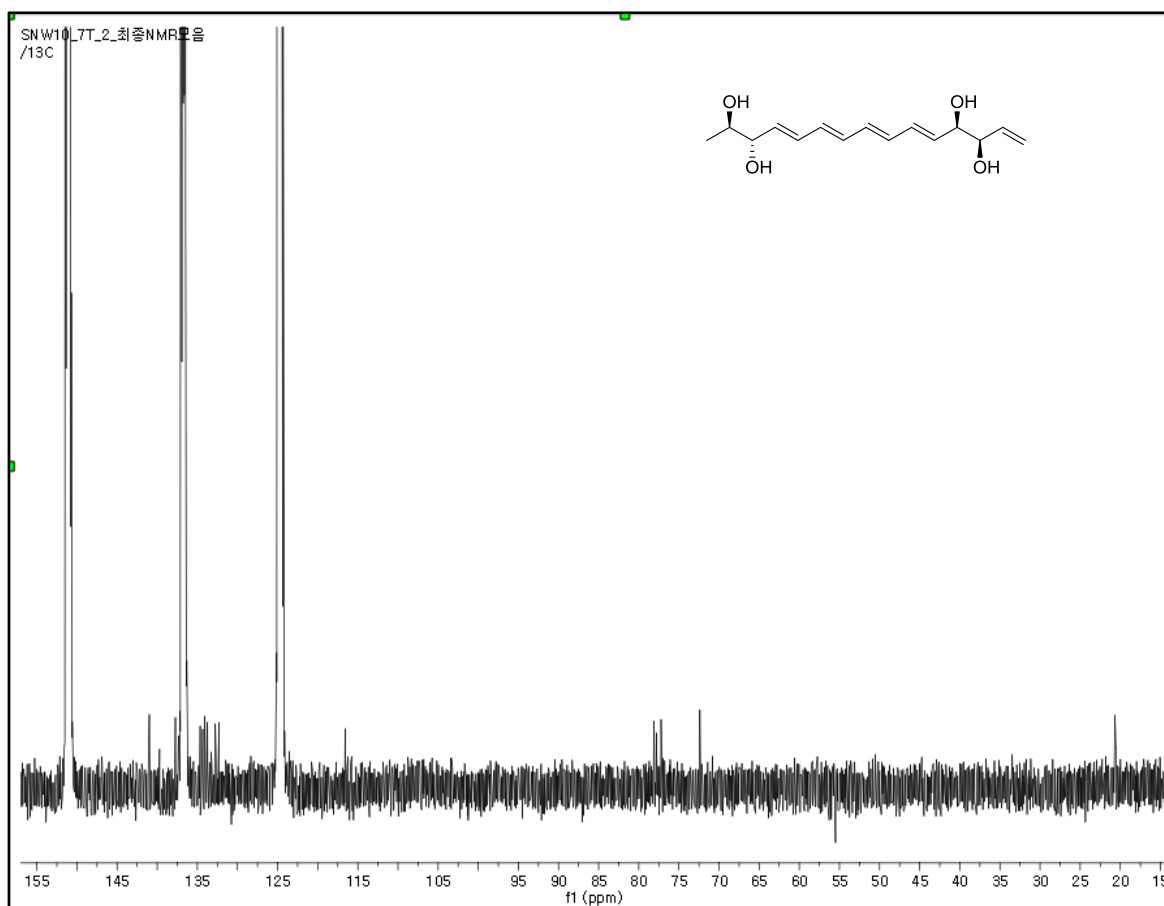

**Figure S9.**  $^1\text{H}$  NMR spectrum of separacene C (**3**) at 600 MHz in pyridine- $d_5$ .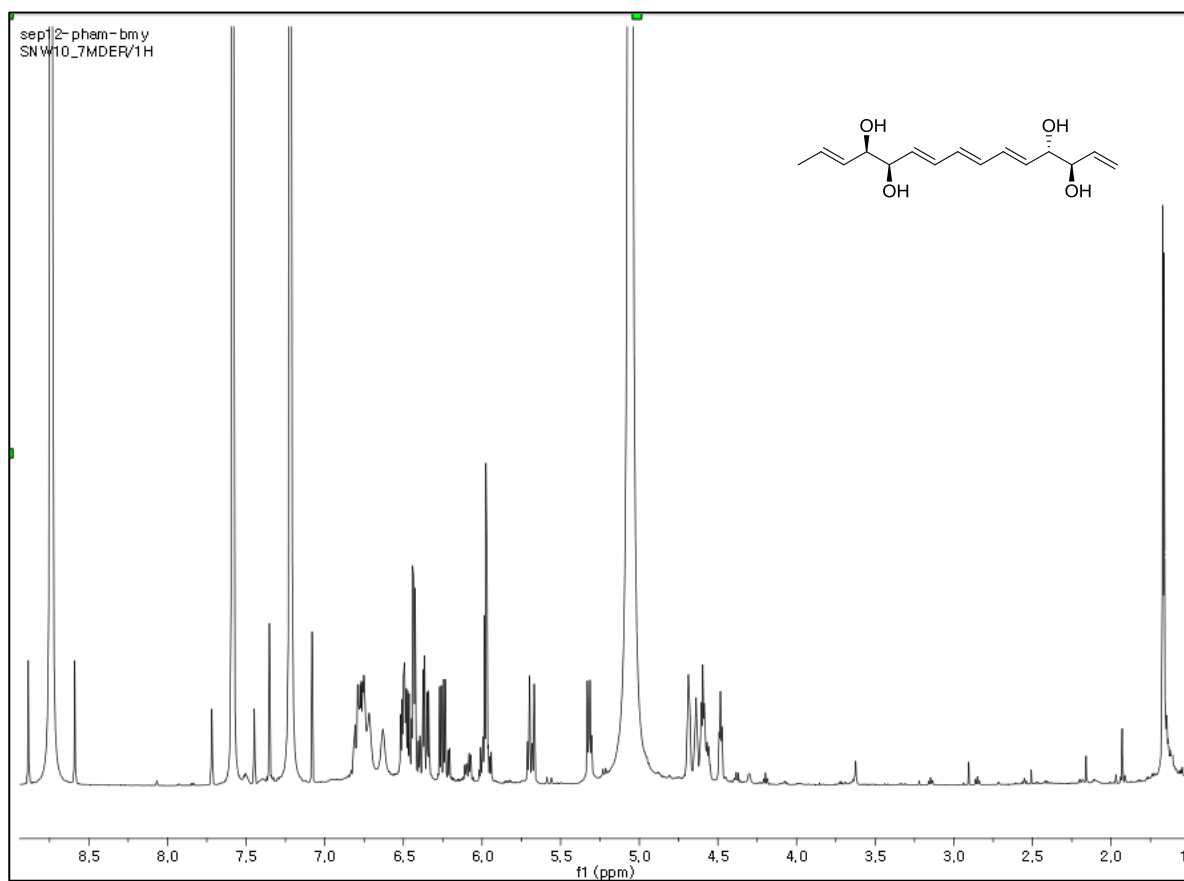**Figure S10.**  $^{13}\text{C}$  NMR spectrum of separacene C (**3**) at 125 MHz in pyridine- $d_5$ .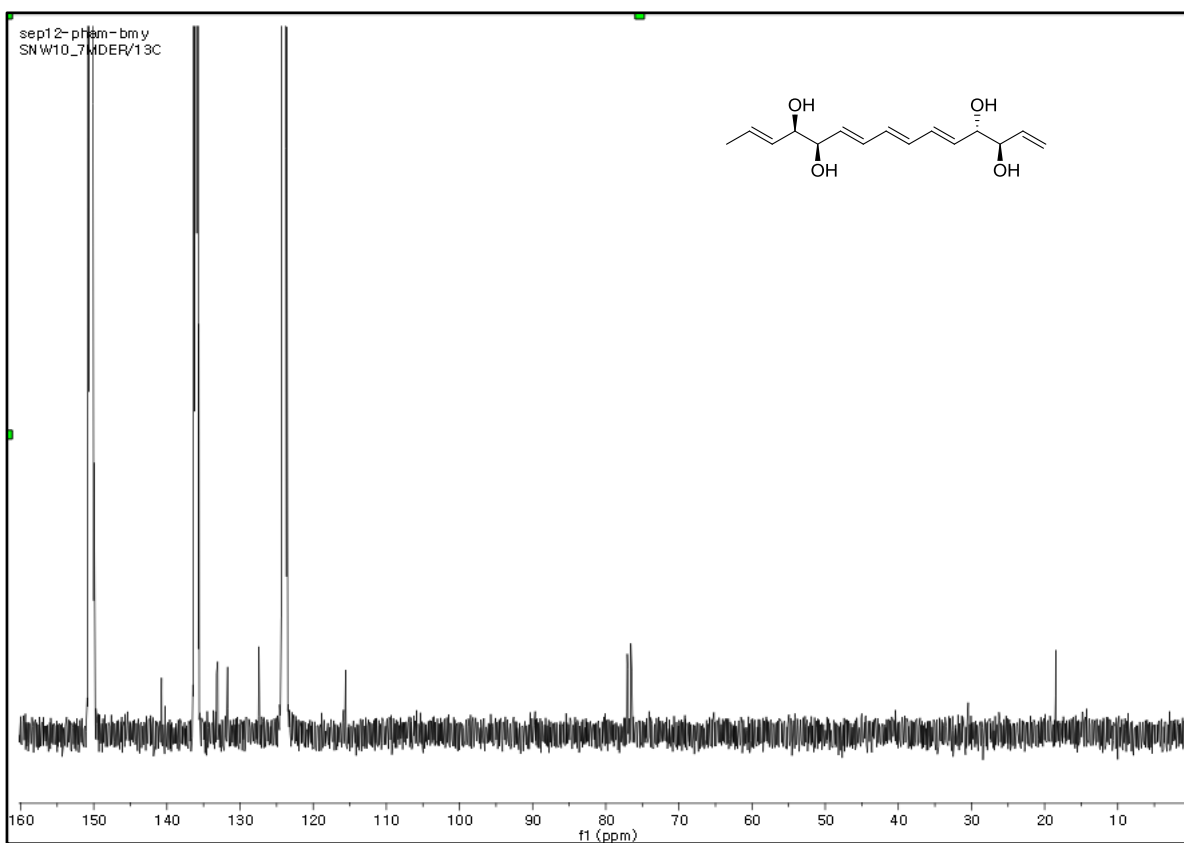

**Figure S11.**  $^1\text{H}$  NMR spectrum of separacene D (**4**) at 600 MHz in pyridine- $d_5$ .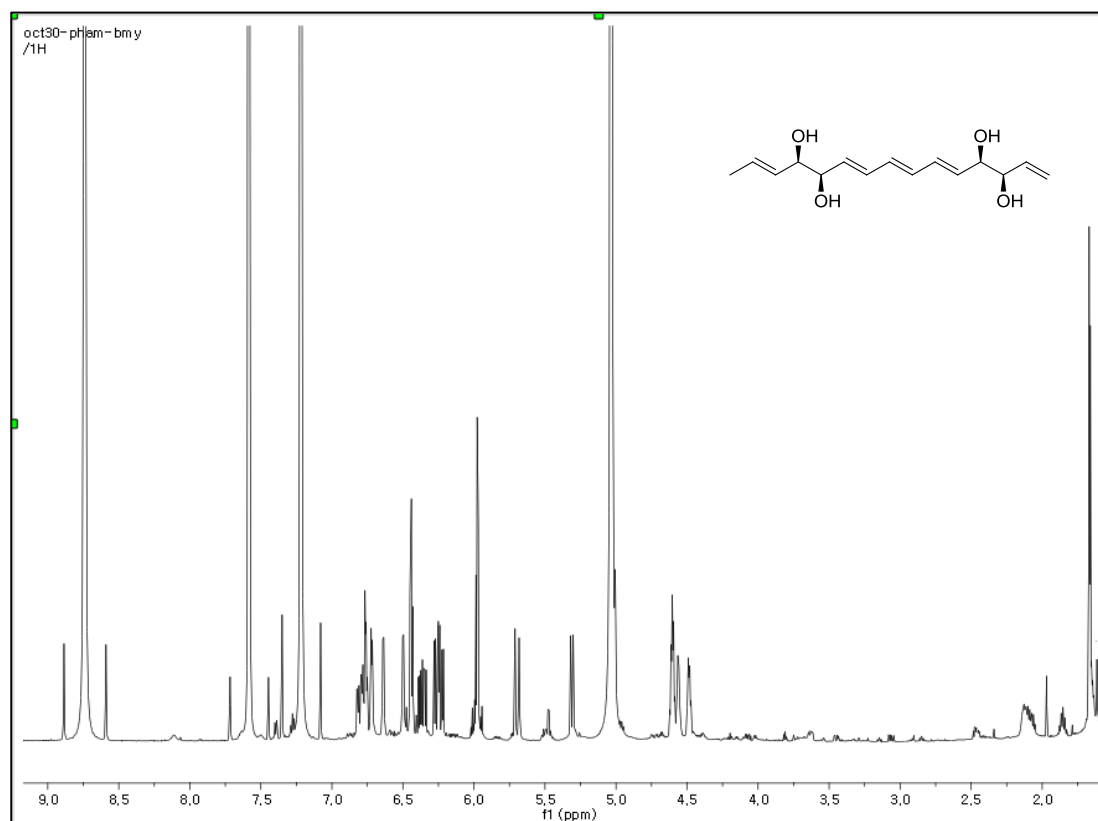**Figure S12.**  $^{13}\text{C}$  NMR spectrum of separacene D (**4**) at 125 MHz in pyridine- $d_5$ .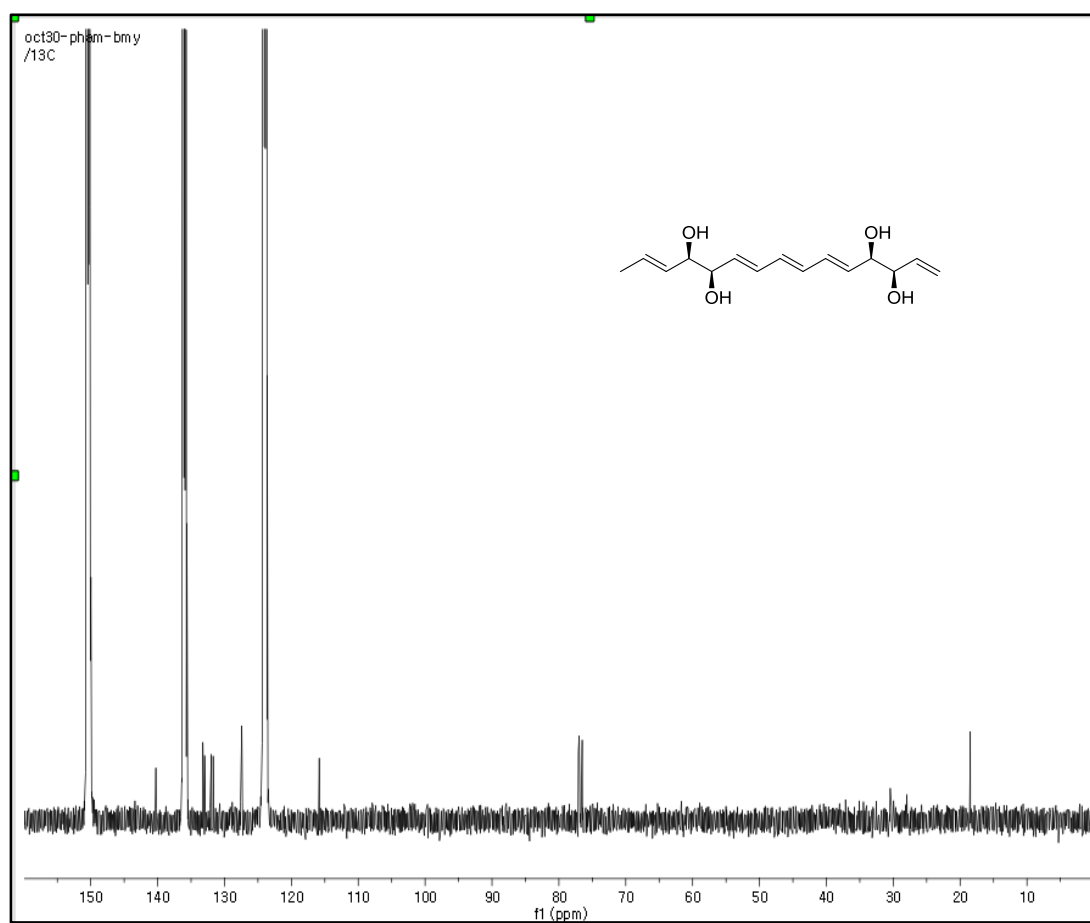

**Figure S13.**  $^1\text{H}$  NMR spectrum of *S*-MTPA ester (**5**) for separacene A (**1**) at 600 MHz in pyridine- $d_5$ .

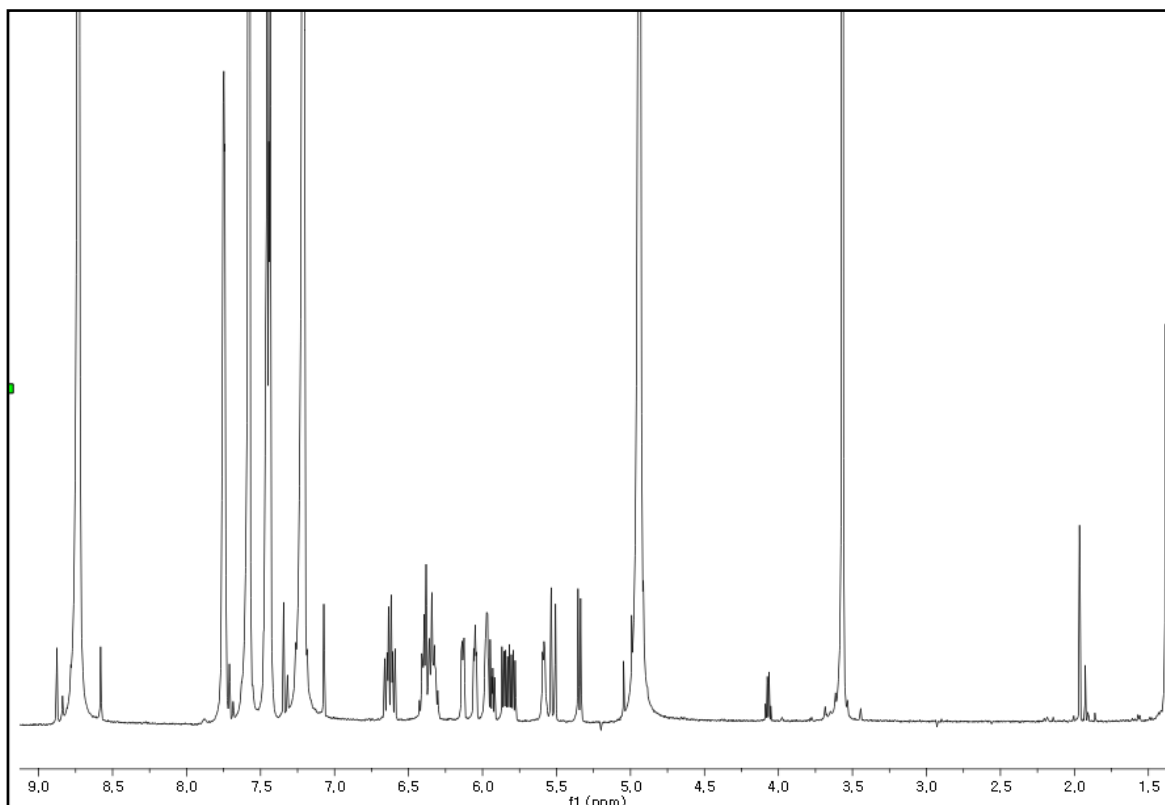

**Figure S14.**  $^1\text{H}$  NMR spectrum of *R*-MTPA (**6**) ester for separacene A (**1**) at 600 MHz in pyridine- $d_5$ .

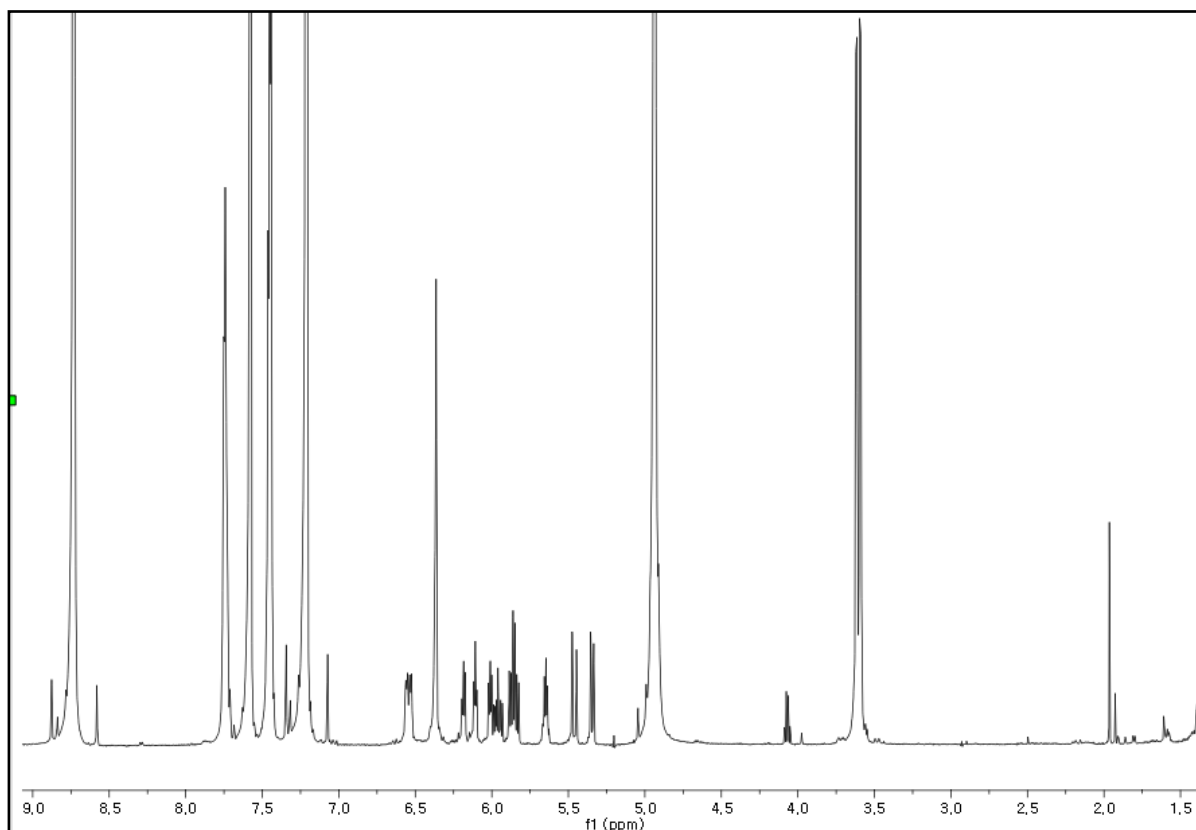

**Figure S15.**  $^1\text{H}$  NMR spectrum of *S*-MTPA ester (**7**) for separacene B (**2**) at 600 MHz in pyridine- $d_5$ .

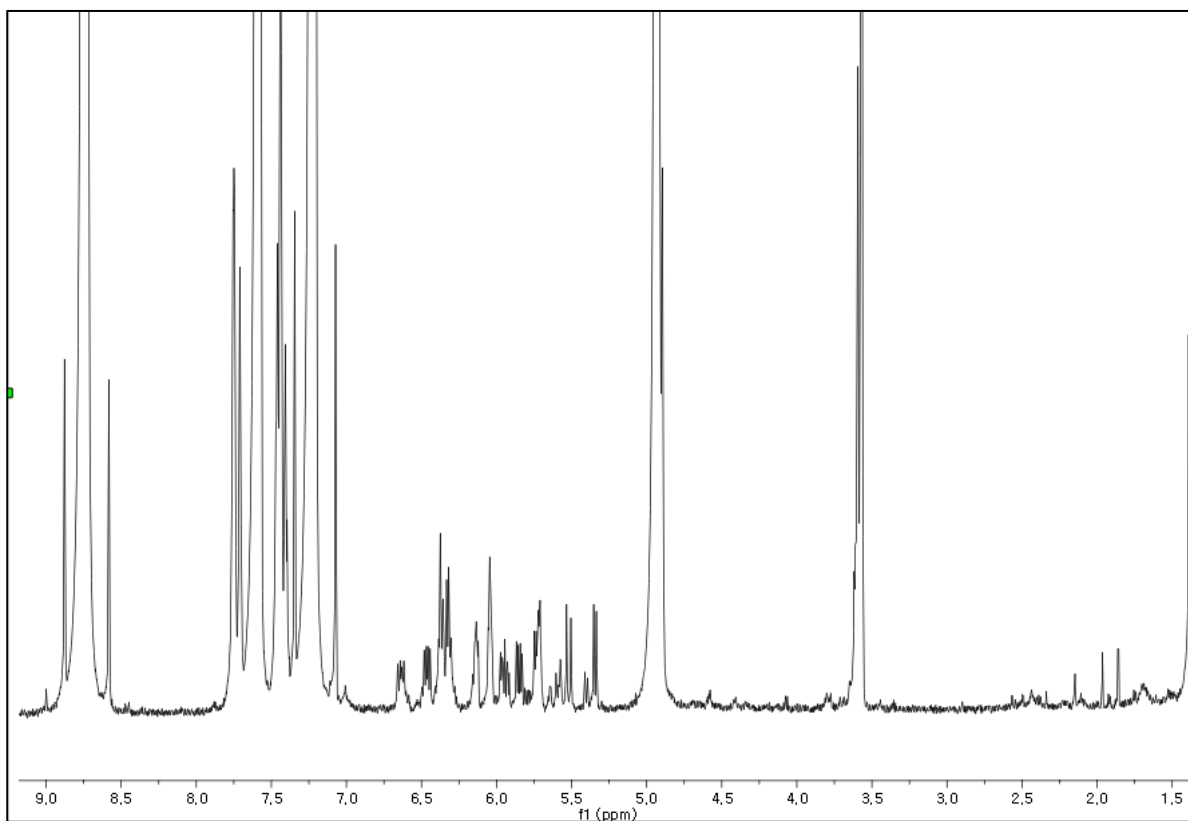

**Figure S16.**  $^1\text{H}$  NMR spectrum of *R*-MTPA ester (**8**) for separacene B (**2**) at 600 MHz in pyridine- $d_5$ .

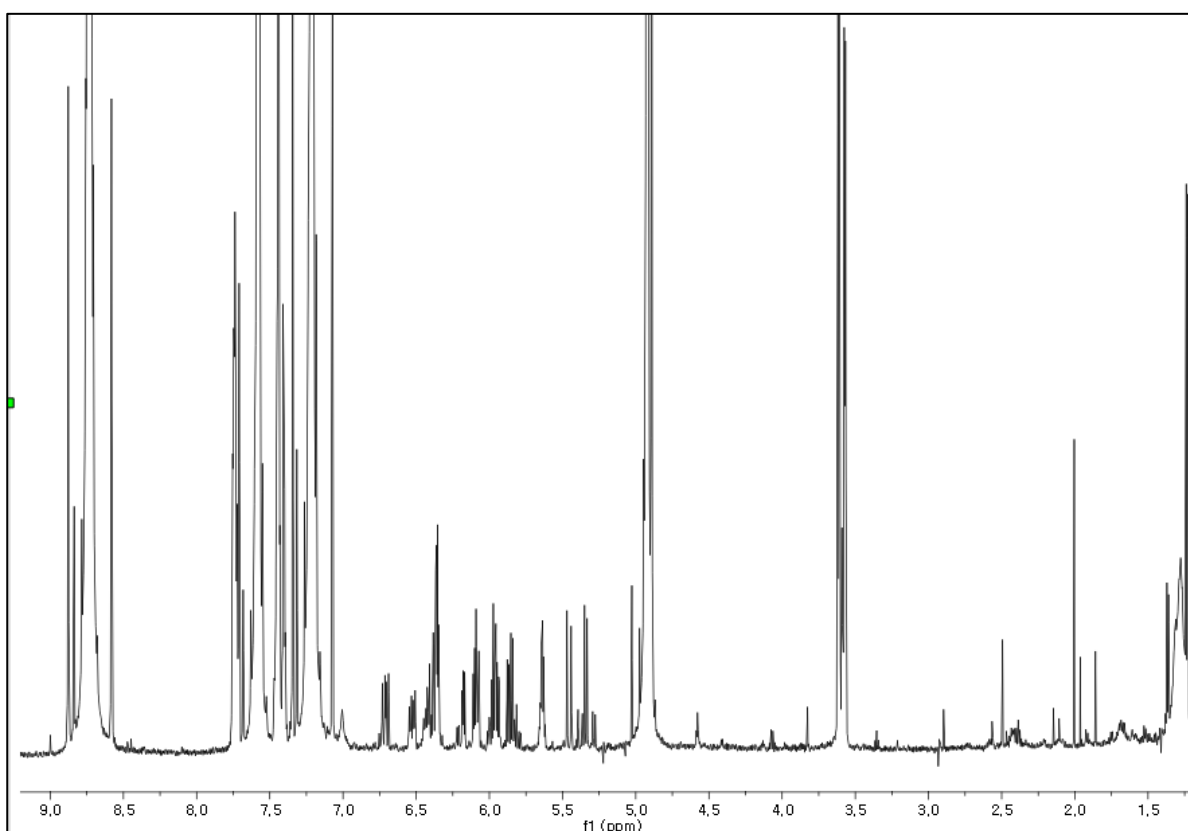



**Figure S17.**  $^1\text{H}$  NMR spectrum of *S*-MTPA ester (**9**) for separacene C (**3**) at 600 MHz in pyridine- $d_5$ .

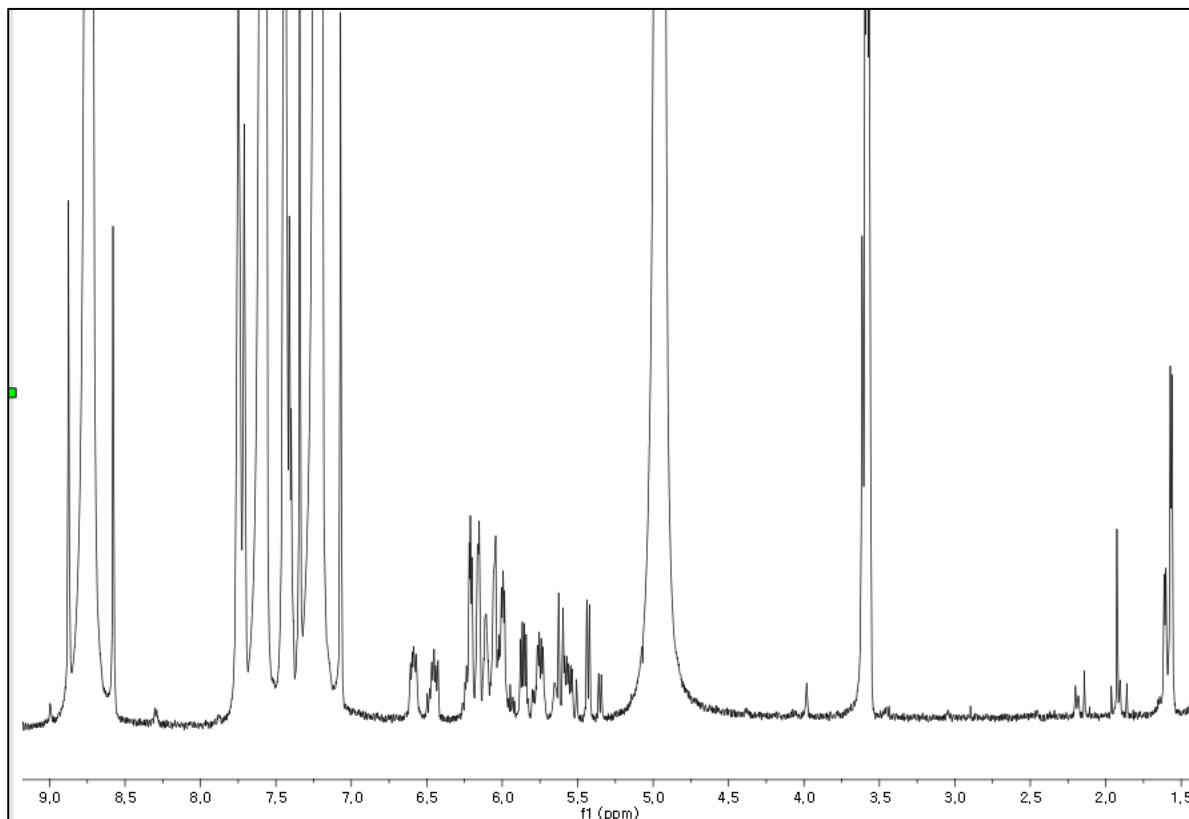

**Figure S18.**  $^1\text{H}$  NMR spectrum of *R*-MTPA ester (**10**) for separacene C (**3**) at 600 MHz in pyridine- $d_5$ .

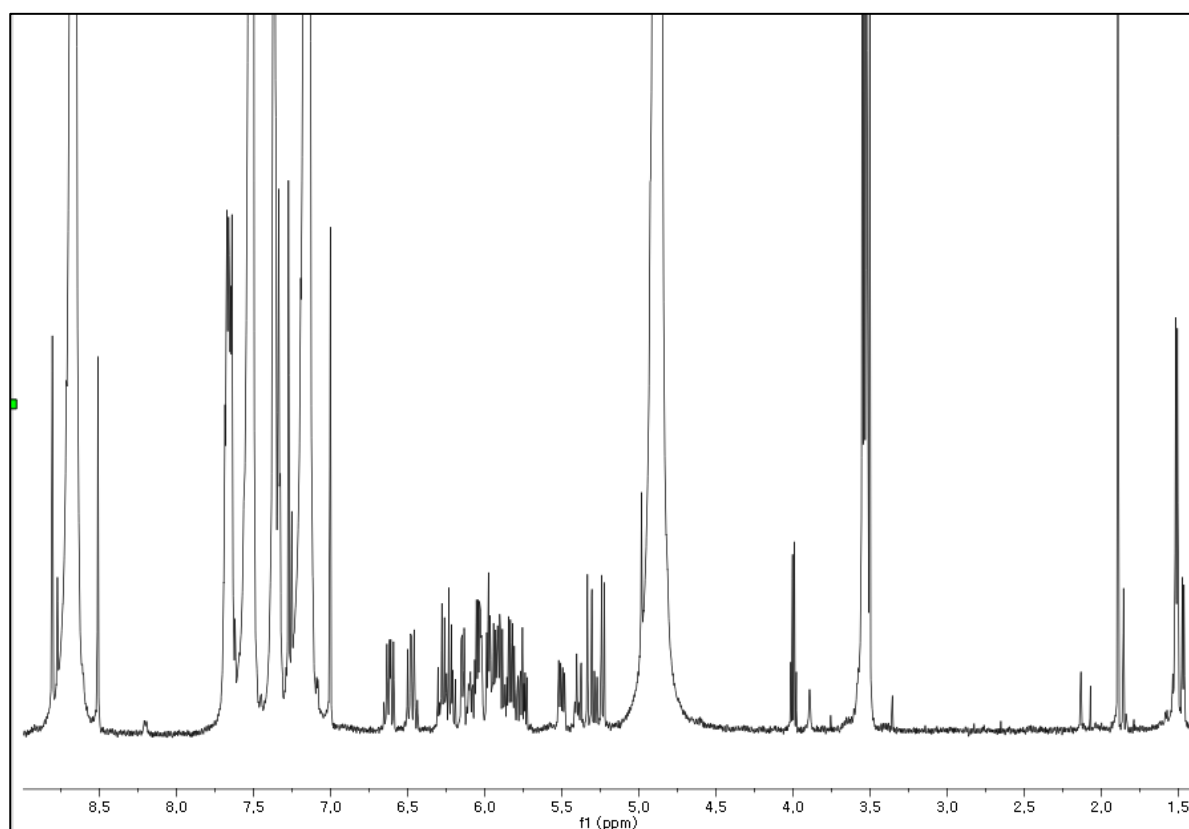

**Figure S19.**  $^1\text{H}$  NMR spectrum of *S*-MTPA ester (**11**) for separacene D (**4**) at 600 MHz in pyridine- $d_5$ .

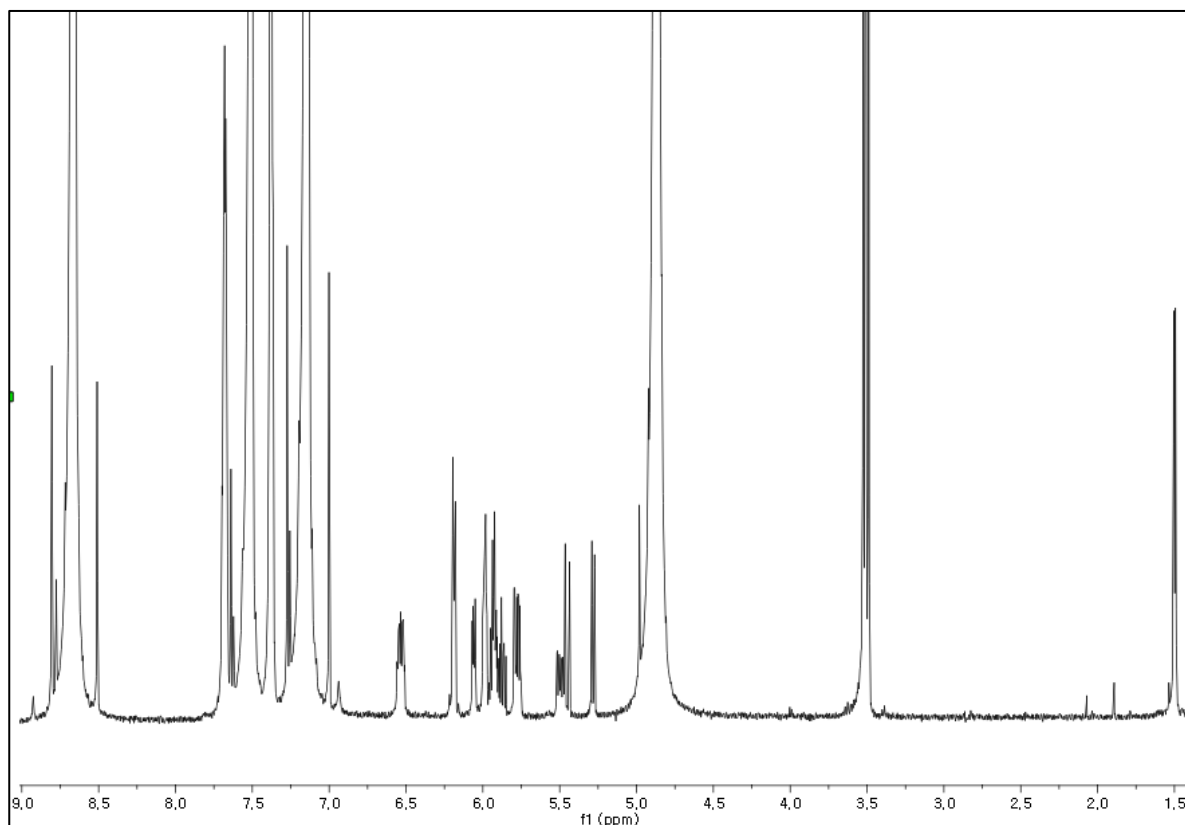

**Figure S20.**  $^1\text{H}$  NMR spectrum of *R*-MTPA ester (**12**) for separacene D (**4**) at 600 MHz in pyridine- $d_5$ .

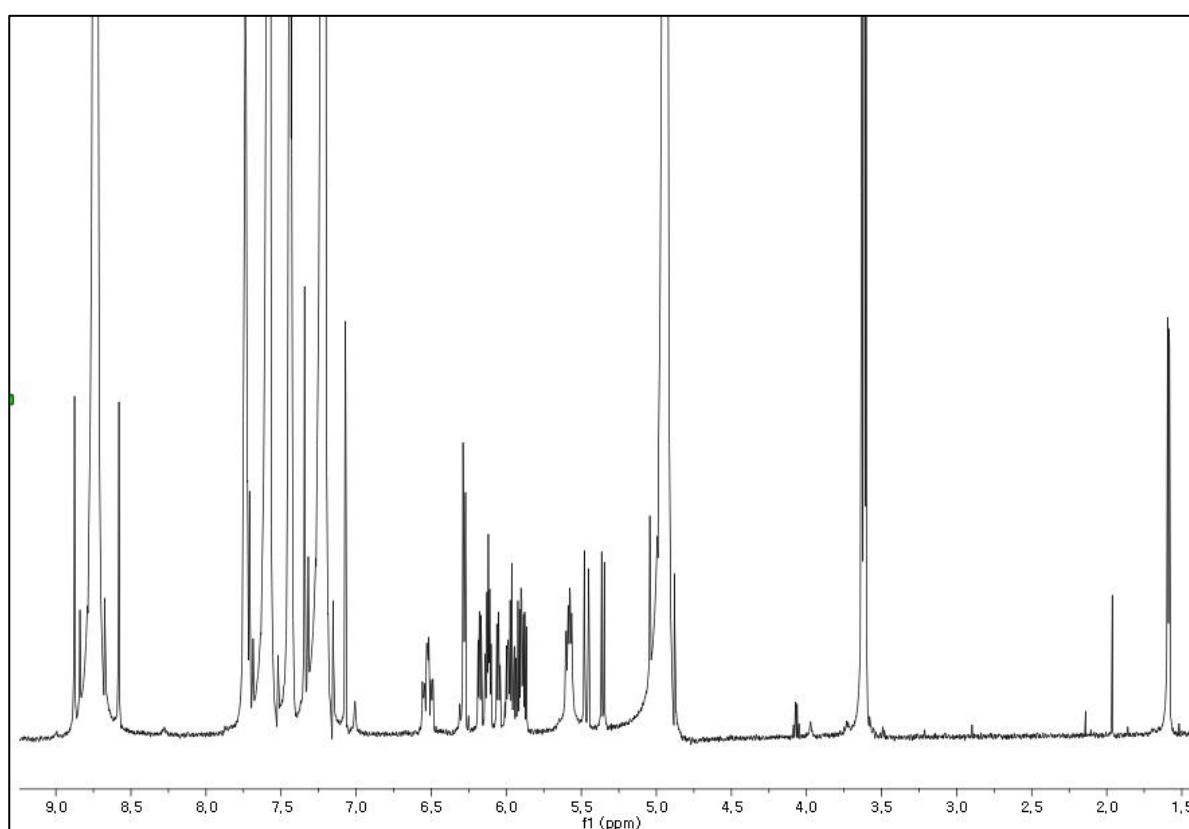

**Figure S21.** Phylogenetic tree based on 16S rDNA sequences of SNJ210 (1404bp).

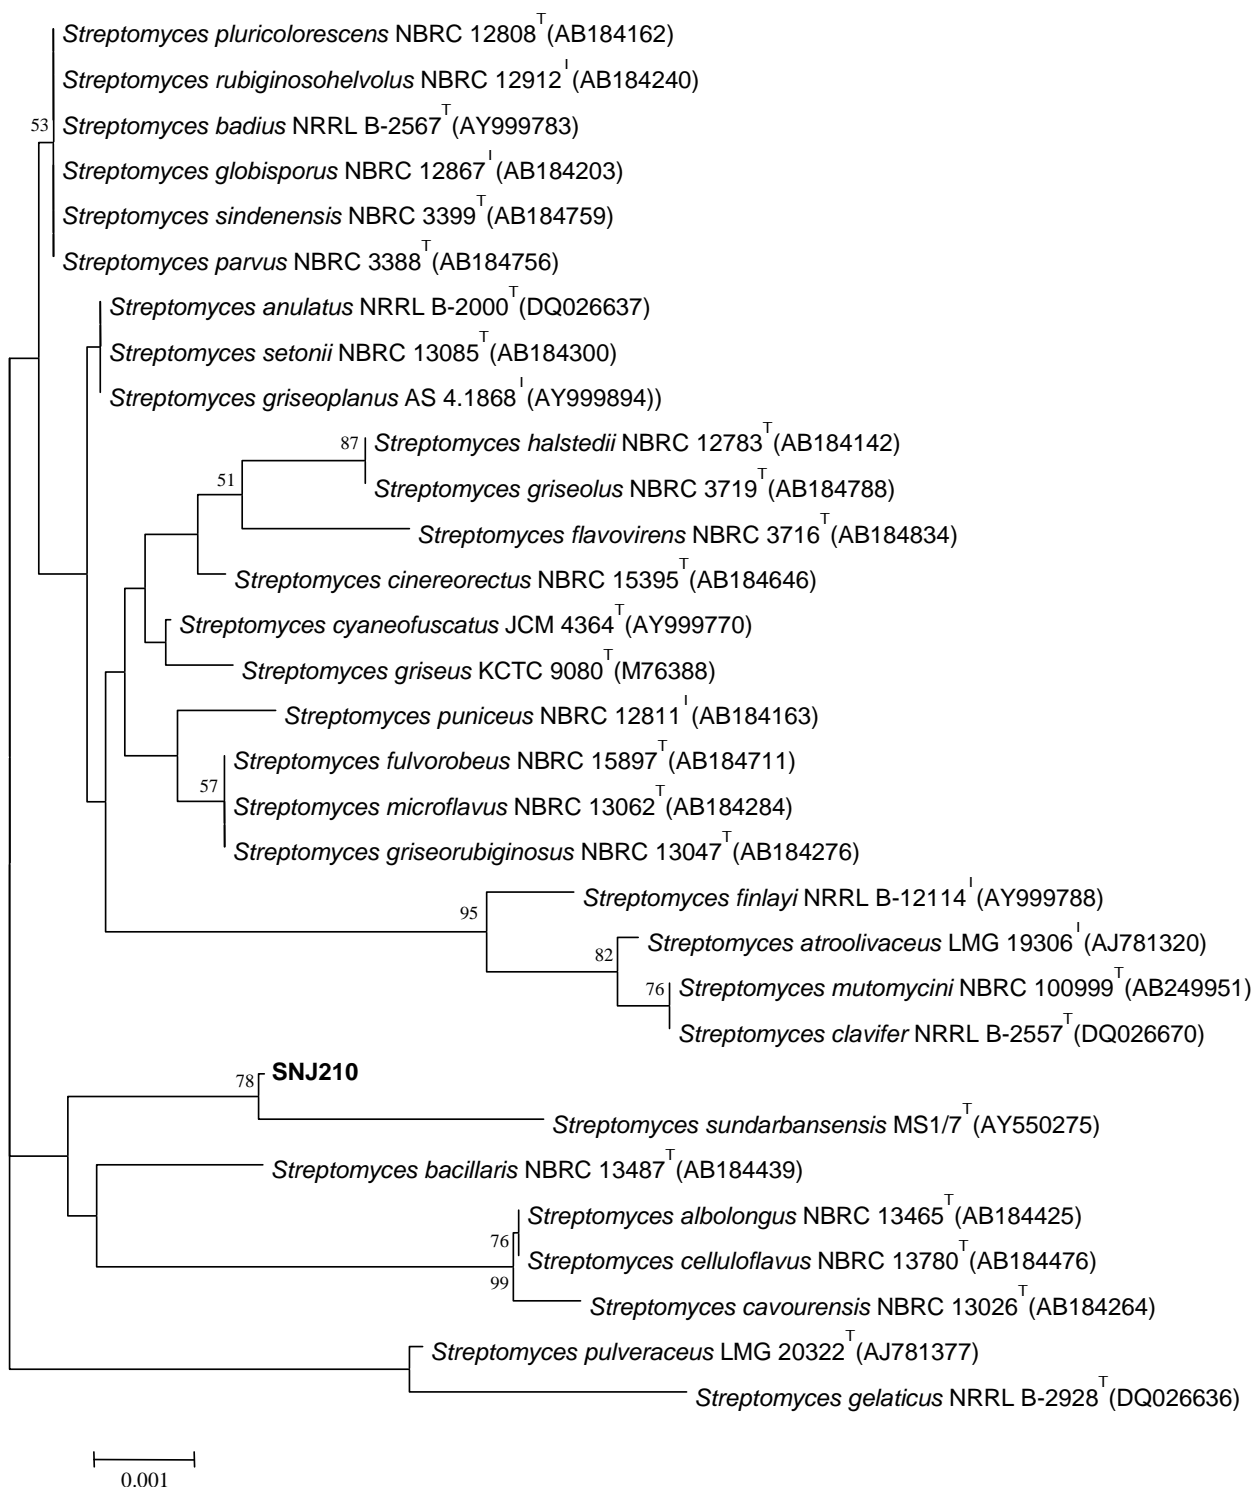

**Figure S22.** 16S rDNA sequence data of *Streptomyces* sp. SNJ210.

ATGCAAGTCGAACGATGAAATCACTTCGGTGGTGGATTAGTGGCGAACGGGTGAGTAAC  
ACGTGGGCAATCTGCCCTTCACTCTGGGACAAGCCCTGGAAACGGGGTCTAATACCGGAT  
ACCACTCTGTCCCGCATGGGACGGGGTTGAAAGCTCCGGCGGTGAAGGATGAGCCCGCG  
GCCTATCAGCTTGTTGGTGGGGTAATGGCCTACCAAGGCGACGACGGGTAGCCGGCCTGA  
GAGGGCGACCGGCCACACTGGGACTGAGACACGGCCCAGACTCCTACGGGAGGCAGCAG  
TGGGGAATATTGCACAATGGGCGAAAGCCTGATGCAGCGACGCCGCGTGAGGGATGACG  
GCCTTCGGGTTGTAACCTCTTTCAGCAGGGAAGAAGCGCAAGTGACGGTACCTGCAGAA  
GAAGCGCCGGCTAACTACGTGCCAGCAGCCGCGGTAATACGTAGGGCGCAAGCGTTGTCC  
GGAATTATTGGGCGTAAAGAGCTCGTAGGCGGCTTGTCACGTCGGATGTGAAAGCCCGGG  
GCTTAACCCCGGGTCTGCATTTCGATACGGGCTAGCTAGAGTGTGGTAGGGGAGATCGGAA  
TTCTTGGTGTAGCGGTGAAATGCGCAGATATCAGGAGGAACACCGGTGGCGAAGGCGGA  
TCTCTGGGCCATTACTGACGCTGAGGAGCGAAAGCGTGGGGAGCGAACAGGATTAGATA  
CCCTGGTAGTCCACGCCGTAAACGTTGGGAAGTGGTGTGGCGACATTCACGTCGTCG  
GTGCCGACGCTAACGCATTAAGTTCCTCCCGCCTGGGGAGTACGGCCGCAAGGCTAAACTC  
AAAGGAATTGACGGGGGCCCACACAAGCAGCGGAGCATGTGGCTTAATTCGACGCAACG  
CGAAGAACCTTACCAAGGCTTGACATATACCGGAAAGCATCAGAGATGGTGCCCCCTTG  
TGGTCGGTATACAGGTGGTGCATGGCTGTCGTCAGCTCGTGTGTCGATGTTGGGTTAA  
GTCCCGCAACGAGCGCAACCCTTGTCTGTGTTGCCAGCATGCCCTTCGGGGTGTATGGGG  
ACTCACAGGAGACTGCCGGGGTCAACTCGGAGGAAGGTGGGGACGACGTCAAGTCATCA  
TGCCCCCTTATGTCTTGGGCTGCACACGTGCTACAATGGCCGGTACAATGAGCTGCGATGC  
CGCGAGGCGGAGCGAATCTCAAAAAGCCGGTCTCAGTTCGGATTGGGGTCTGCAACTCGA  
CCCCATGAAGTCGGAGTTGCTAGTAATCGCAGATCAGCATTGCTGCGGTGAATACGTTCC  
CGGGCCTTGTACACACCGCCCGTCACGTCACGAAAGTCGGTAACACCCGAAGCCGGTGGC  
CCAACCCCTTGTGGGAGGGAGCTGTCTGAAGGT
