# Supplementary material for: Separacenes A–D, Novel Polyene Polyols from the Marine Actinomycete, Streptomyces sp
Source: MDPI journal article supplement (doi:10.3390/md11082882), 2013-08-13
Supplement: s2 [file s2]

marinedrugs-11-02882-s001.mol
  corina  04141403053D 1   1.00000     0.00000 
CORINA 3.49 0023  12.04.2013
 19 18  0  0  0  0  0  0  0  0999 V2000
   -0.0187    1.5258    0.0104 C   0  0  0  0  0  0  0  0  0  0  0  0
    0.0021   -0.0041    0.0020 C   0  0  0  0  0  0  0  0  0  0  0  0
    0.7421   -0.5109    1.2415 C   0  0  0  0  0  0  0  0  0  0  0  0
    0.8700   -2.0108    1.1719 C   0  0  0  0  0  0  0  0  0  0  0  0
    2.0719   -2.5832    1.2664 C   0  0  0  0  0  0  0  0  0  0  0  0
    2.1961   -4.0389    1.1988 C   0  0  0  0  0  0  0  0  0  0  0  0
    3.4156   -4.6196    1.2947 C   0  0  0  0  0  0  0  0  0  0  0  0
    3.5355   -6.0258    1.2294 C   0  0  0  0  0  0  0  0  0  0  0  0
    4.7550   -6.6065    1.3252 C   0  0  0  0  0  0  0  0  0  0  0  0
    4.8792   -8.0623    1.2576 C   0  0  0  0  0  0  0  0  0  0  0  0
    6.0811   -8.6346    1.3521 C   0  0  0  0  0  0  0  0  0  0  0  0
    6.2090  -10.1345    1.2825 C   0  0  0  0  0  0  0  0  0  0  0  0
    7.1954  -10.5114    0.1752 C   0  0  0  0  0  0  0  0  0  0  0  0
    7.2309  -12.0103    0.0229 C   0  0  0  0  0  0  0  0  0  0  0  0
    7.0009  -12.5555   -1.1458 C   0  0  0  0  0  0  0  0  0  0  0  0
    0.6709   -0.4649   -1.1737 O   0  0  0  0  0  0  0  0  0  0  0  0
    2.0438    0.0763    1.2925 O   0  0  0  0  0  0  0  0  0  0  0  0
    4.9318  -10.7088    0.9984 O   0  0  0  0  0  0  0  0  0  0  0  0
    6.7792   -9.9173   -1.0560 O   0  0  0  0  0  0  0  0  0  0  0  0
  1  2  1  0      
  2  3  1  0      
  3  4  1  0      
  4  5  2  0      
  5  6  1  0      
  6  7  2  0      
  7  8  1  0      
  8  9  2  0      
  9 10  1  0      
 10 11  2  0      
 11 12  1  0      
 12 13  1  0      
 13 14  1  0      
 14 15  2  0      
  2 16  1  0      
  3 17  1  0      
 12 18  1  0      
 13 19  1  0      
M  END
$$$$
