# Supplementary material for: Separacenes A–D, Novel Polyene Polyols from the Marine Actinomycete, Streptomyces sp
Source: MDPI journal article supplement (doi:10.3390/md11082882), 2013-08-13
Supplement: s4 [file s4]

marinedrugs-11-02882-s002.mol
  corina  04141403053D 1   1.00000     0.00000 
CORINA 3.49 0023  12.04.2013
 19 18  0  0  0  0  0  0  0  0999 V2000
   -0.0187    1.5258    0.0104 C   0  0  0  0  0  0  0  0  0  0  0  0
    0.0021   -0.0041    0.0020 C   0  0  0  0  0  0  0  0  0  0  0  0
    0.7421   -0.5109    1.2415 C   0  0  0  0  0  0  0  0  0  0  0  0
    0.7625   -2.0177    1.2333 C   0  0  0  0  0  0  0  0  0  0  0  0
    1.9272   -2.6692    1.2186 C   0  0  0  0  0  0  0  0  0  0  0  0
    1.9470   -4.1317    1.2106 C   0  0  0  0  0  0  0  0  0  0  0  0
    3.1287   -4.7927    1.1958 C   0  0  0  0  0  0  0  0  0  0  0  0
    3.1479   -6.2054    1.1880 C   0  0  0  0  0  0  0  0  0  0  0  0
    4.3296   -6.8664    1.1732 C   0  0  0  0  0  0  0  0  0  0  0  0
    4.3494   -8.3288    1.1651 C   0  0  0  0  0  0  0  0  0  0  0  0
    5.5141   -8.9803    1.1505 C   0  0  0  0  0  0  0  0  0  0  0  0
    5.5345  -10.4872    1.1422 C   0  0  0  0  0  0  0  0  0  0  0  0
    6.3575  -10.9795   -0.0500 C   0  0  0  0  0  0  0  0  0  0  0  0
    6.2767  -12.4822   -0.1298 C   0  0  0  0  0  0  0  0  0  0  0  0
    5.8761  -13.0588   -1.2357 C   0  0  0  0  0  0  0  0  0  0  0  0
    0.6709   -0.4649   -1.1737 O   0  0  0  0  0  0  0  0  0  0  0  0
    0.0732   -0.0501    2.4172 O   0  0  0  0  0  0  0  0  0  0  0  0
    4.1979  -10.9811    1.0349 O   0  0  0  0  0  0  0  0  0  0  0  0
    5.8395  -10.4100   -1.2539 O   0  0  0  0  0  0  0  0  0  0  0  0
  1  2  1  0      
  2  3  1  0      
  3  4  1  0      
  4  5  2  0      
  5  6  1  0      
  6  7  2  0      
  7  8  1  0      
  8  9  2  0      
  9 10  1  0      
 10 11  2  0      
 11 12  1  0      
 12 13  1  0      
 13 14  1  0      
 14 15  2  0      
  2 16  1  0      
 12 18  1  0      
 13 19  1  0      
  3 17  1  0      
M  END
$$$$
