# Supplementary material for: Separacenes A–D, Novel Polyene Polyols from the Marine Actinomycete, Streptomyces sp
Source: MDPI journal article supplement (doi:10.3390/md11082882), 2013-08-13
Supplement: s7 [file s7]

marinedrugs-11-02882-s003.mol
  ChemDraw12271311512D

 19 18  0  0  0  0  0  0  0  0999 V2000
   -5.0013   -0.2062    0.0000 C   0  0  0  0  0  0  0  0  0  0  0  0
   -4.2868    0.2062    0.0000 C   0  0  0  0  0  0  0  0  0  0  0  0
   -3.5724   -0.2062    0.0000 C   0  0  0  0  0  0  0  0  0  0  0  0
   -2.8579    0.2062    0.0000 C   0  0  0  0  0  0  0  0  0  0  0  0
   -2.1434   -0.2062    0.0000 C   0  0  0  0  0  0  0  0  0  0  0  0
   -1.4289    0.2062    0.0000 C   0  0  0  0  0  0  0  0  0  0  0  0
   -0.7145   -0.2062    0.0000 C   0  0  0  0  0  0  0  0  0  0  0  0
   -0.0000    0.2062    0.0000 C   0  0  0  0  0  0  0  0  0  0  0  0
    0.7145   -0.2062    0.0000 C   0  0  0  0  0  0  0  0  0  0  0  0
    1.4289    0.2062    0.0000 C   0  0  0  0  0  0  0  0  0  0  0  0
    2.1434   -0.2062    0.0000 C   0  0  0  0  0  0  0  0  0  0  0  0
    2.8579    0.2062    0.0000 C   0  0  0  0  0  0  0  0  0  0  0  0
    3.5724   -0.2062    0.0000 C   0  0  0  0  0  0  0  0  0  0  0  0
    4.2868    0.2062    0.0000 C   0  0  0  0  0  0  0  0  0  0  0  0
    5.0013   -0.2062    0.0000 C   0  0  0  0  0  0  0  0  0  0  0  0
    2.8579    1.0313    0.0000 O   0  0  0  0  0  0  0  0  0  0  0  0
    3.5724   -1.0313    0.0000 O   0  0  0  0  0  0  0  0  0  0  0  0
   -2.1434   -1.0313    0.0000 O   0  0  0  0  0  0  0  0  0  0  0  0
   -2.8579    1.0313    0.0000 O   0  0  0  0  0  0  0  0  0  0  0  0
  1  2  1  0      
  2  3  2  0      
  3  4  1  0      
  4  5  1  0      
  5  6  1  0      
  6  7  2  0      
  7  8  1  0      
  8  9  2  0      
  9 10  1  0      
 10 11  2  0      
 11 12  1  0      
 12 13  1  0      
 13 14  1  0      
 14 15  2  0      
 13 17  1  1      
 12 16  1  6      
  5 18  1  1      
  4 19  1  1      
M  END
