# Supplementary material for: Separacenes A–D, Novel Polyene Polyols from the Marine Actinomycete, Streptomyces sp
Source: MDPI journal article supplement (doi:10.3390/md11082882), 2013-08-13
Supplement: s8 [file s8]

marinedrugs-11-02882-s004.mol
  corina  04141403053D 1   1.00000     0.00000 
CORINA 3.49 0023  12.04.2013
 19 18  0  0  0  0  0  0  0  0999 V2000
   -0.0184    1.5028    0.0103 C   0  0  0  0  0  0  0  0  0  0  0  0
    0.0021   -0.0041    0.0020 C   0  0  0  0  0  0  0  0  0  0  0  0
   -1.1234   -0.6744    0.0092 C   0  0  0  0  0  0  0  0  0  0  0  0
   -1.1029   -2.1813    0.0009 C   0  0  0  0  0  0  0  0  0  0  0  0
   -1.9120   -2.7088    1.1875 C   0  0  0  0  0  0  0  0  0  0  0  0
   -1.7906   -4.2096    1.2508 C   0  0  0  0  0  0  0  0  0  0  0  0
   -1.3670   -4.7974    2.3696 C   0  0  0  0  0  0  0  0  0  0  0  0
   -1.2490   -6.2560    2.4311 C   0  0  0  0  0  0  0  0  0  0  0  0
   -0.8203   -6.8509    3.5634 C   0  0  0  0  0  0  0  0  0  0  0  0
   -0.7022   -8.3096    3.6250 C   0  0  0  0  0  0  0  0  0  0  0  0
   -0.2787   -8.8973    4.7438 C   0  0  0  0  0  0  0  0  0  0  0  0
   -0.1572  -10.3981    4.8071 C   0  0  0  0  0  0  0  0  0  0  0  0
    1.2643  -10.7775    5.2271 C   0  0  0  0  0  0  0  0  0  0  0  0
    1.4216  -12.2752    5.1718 C   0  0  0  0  0  0  0  0  0  0  0  0
    2.3850  -12.8068    4.4610 C   0  0  0  0  0  0  0  0  0  0  0  0
   -0.4380  -10.9534    3.5207 O   0  0  0  0  0  0  0  0  0  0  0  0
    2.2024  -10.1669    4.3388 O   0  0  0  0  0  0  0  0  0  0  0  0
   -1.4095   -2.1388    2.3977 O   0  0  0  0  0  0  0  0  0  0  0  0
    0.2466   -2.6399    0.1030 O   0  0  0  0  0  0  0  0  0  0  0  0
  1  2  1  0      
  2  3  2  0      
  3  4  1  0      
  4  5  1  0      
  5  6  1  0      
  6  7  2  0      
  7  8  1  0      
  8  9  2  0      
  9 10  1  0      
 10 11  2  0      
 11 12  1  0      
 12 13  1  0      
 13 14  1  0      
 14 15  2  0      
 13 17  1  0      
  5 18  1  0      
  4 19  1  0      
 12 16  1  0      
M  END
$$$$
